# Supplementary material
Source: PubMed Central journal article supplement (PMC3509385)
Supplement: NIHMS420843-supplement-S1b.pdf [file NIHMS420843-supplement-S1b.pdf]

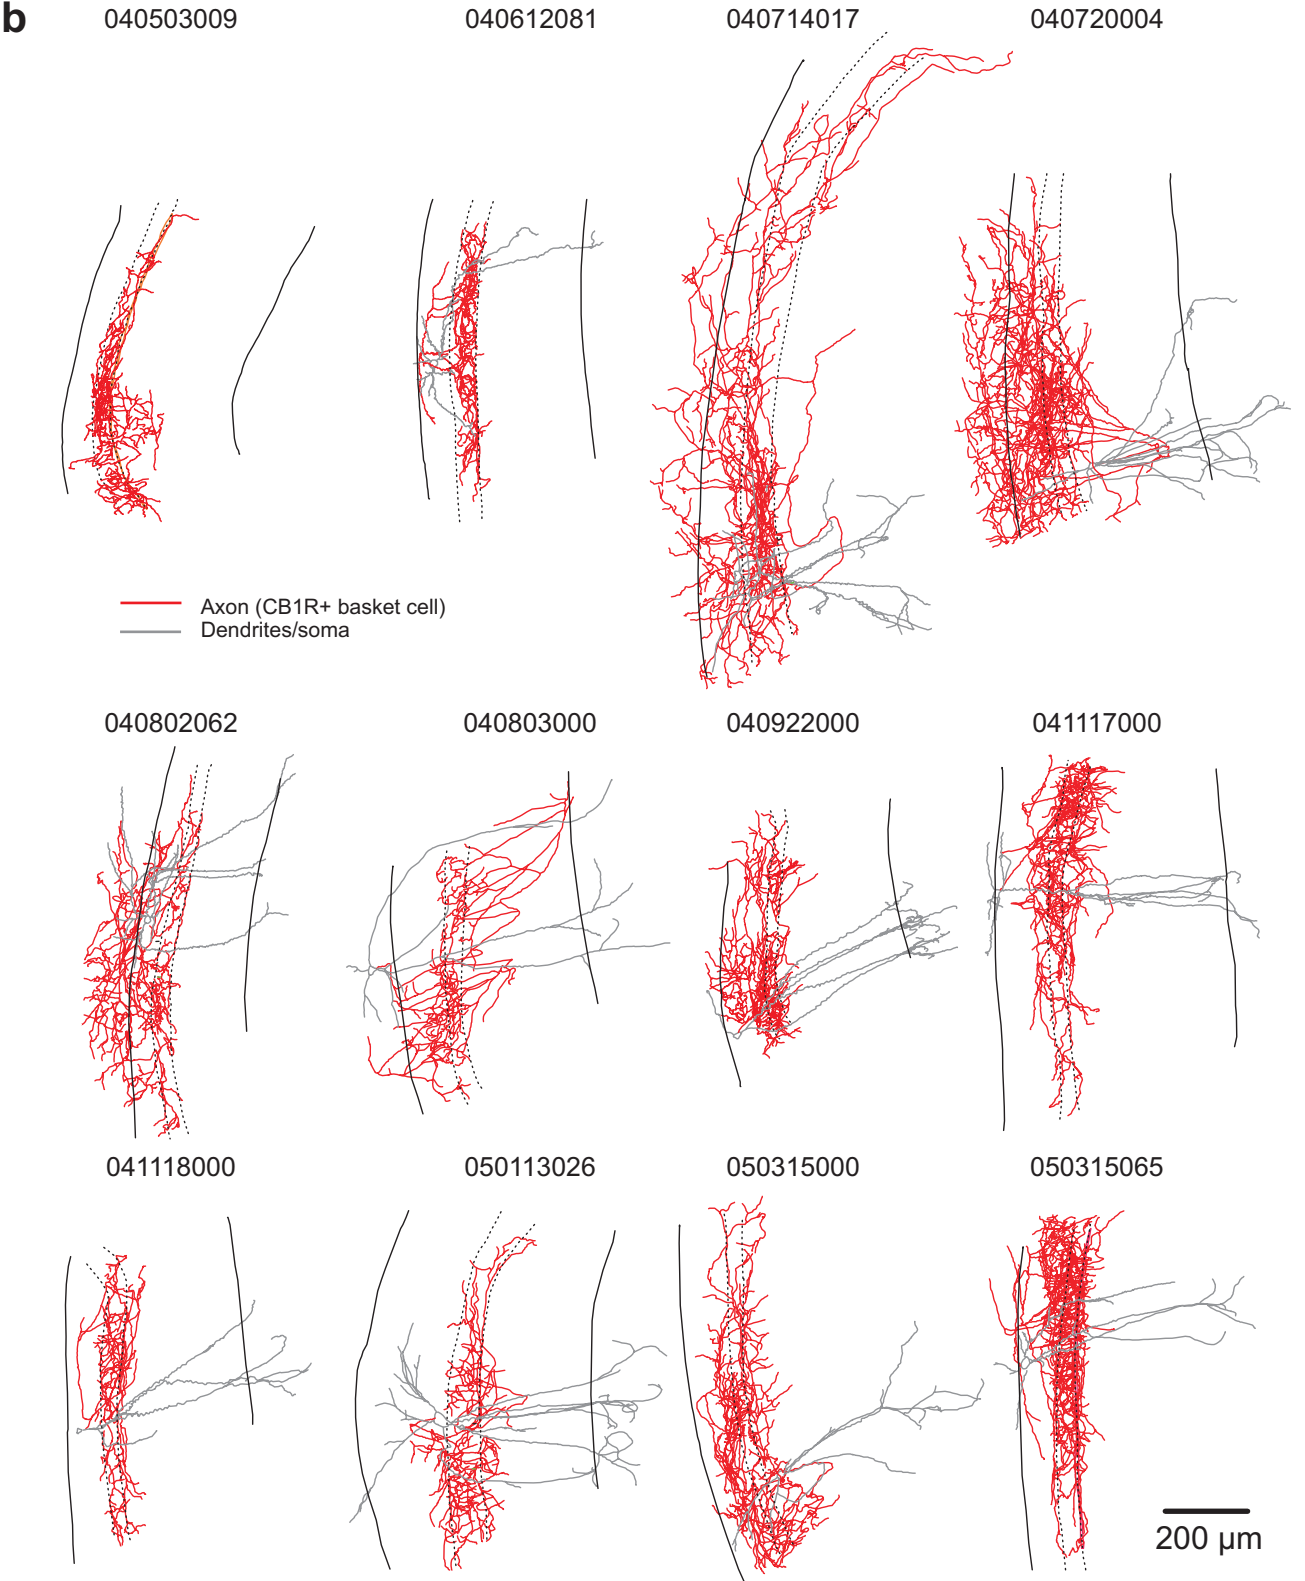

**Supplementary Figure 1. Reconstructions of CB1R positive and negative basket cells.** (a) and (b): NeuroLucida reconstructions of all CB1R positive (axon red, dendrite grey;  $n = 16$ ) and negative (axon blue, dendrite grey;  $n = 11$ ) basket cells quantified in Fig. 2a. All neurons are on the same scale. Drawings are not corrected for shrinkage or the angle of the slice. The longitudinal extent of the axonal arborization is limited by the radial cuts made through the stratum radiatum, creating artificially abrupt borders of the arborization. Stratum oriens (SO), stratum pyramidale (SP), stratum radiatum (SR), and stratum lacunosum-moleculare (SLM).
