# Supplementary material
Source: PubMed Central journal article supplement (PMC3509385)
Supplement: NIHMS420843-supplement-S2.pdf [file NIHMS420843-supplement-S2.pdf]

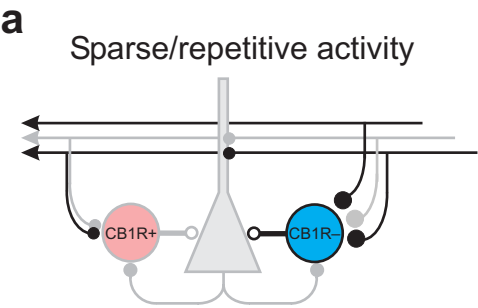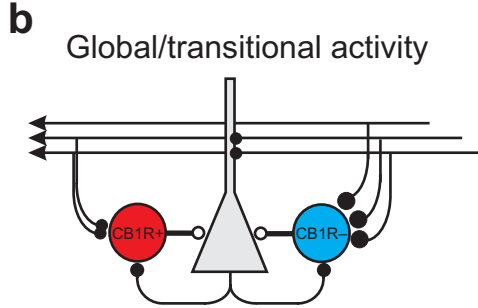

**Supplementary Figure 2. Model for the activation of CB1R positive and negative basket cells.**

**(a)** Under conditions of sparse afferent activity, CB1R negative basket cells (blue), receiving strong excitation, will be recruited to contribute feed-forward inhibition. The weakly excited pyramidal cells (gray) and CB1R positive basket cells (red) will fail to spike under these conditions. Further, under conditions of repetitive activity, inputs to CB1R positive basket will have depressed, while excitation of CB1R negative basket cells remain strong.

**(b)** Under conditions of more global afferent activity, CB1R negative basket cells will continue to participate in the circuit. However, now, pyramidal cells will spike, and will provide feedback excitation to the CB1R positive basket cells. This excitation will arrive a few milliseconds after the feed-forward excitation, summate, and bring CB1R positive basket cells to threshold.
