# Supplementary material
Source: PubMed Central journal article supplement (PMC3509385)

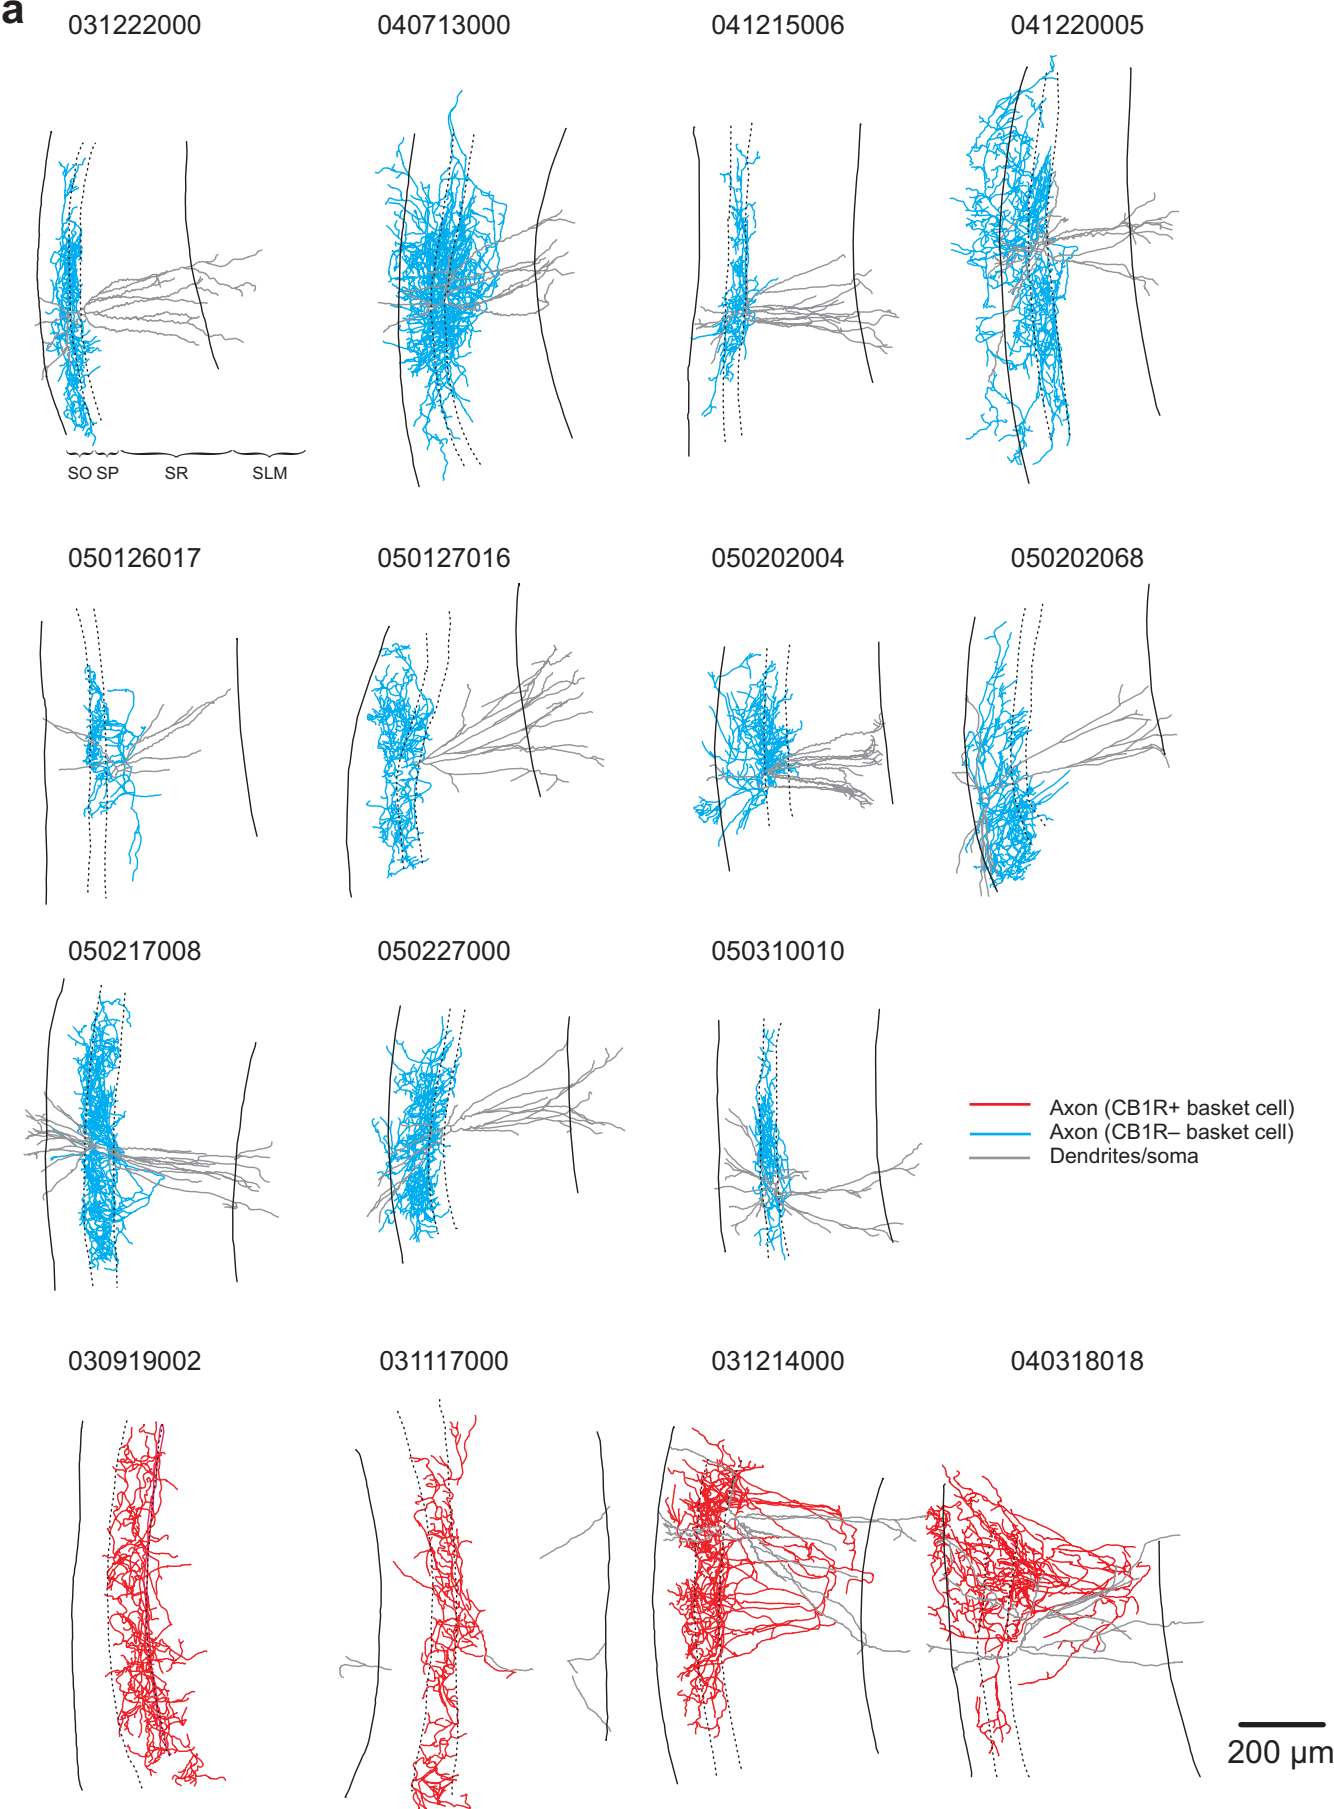

Supplementary Figure 1a

Supplement: NIHMS420843-supplement-S1a.pdf [file NIHMS420843-supplement-S1a.pdf]
